# Supplementary material for: Comparative Genome Analyses of Serratia marcescens FS14 Reveals Its High Antagonistic Potential
Source: PubMed Central journal article supplement (PMC4391916; doi:10.1371/journal.pone.0123061), 2015-04-09

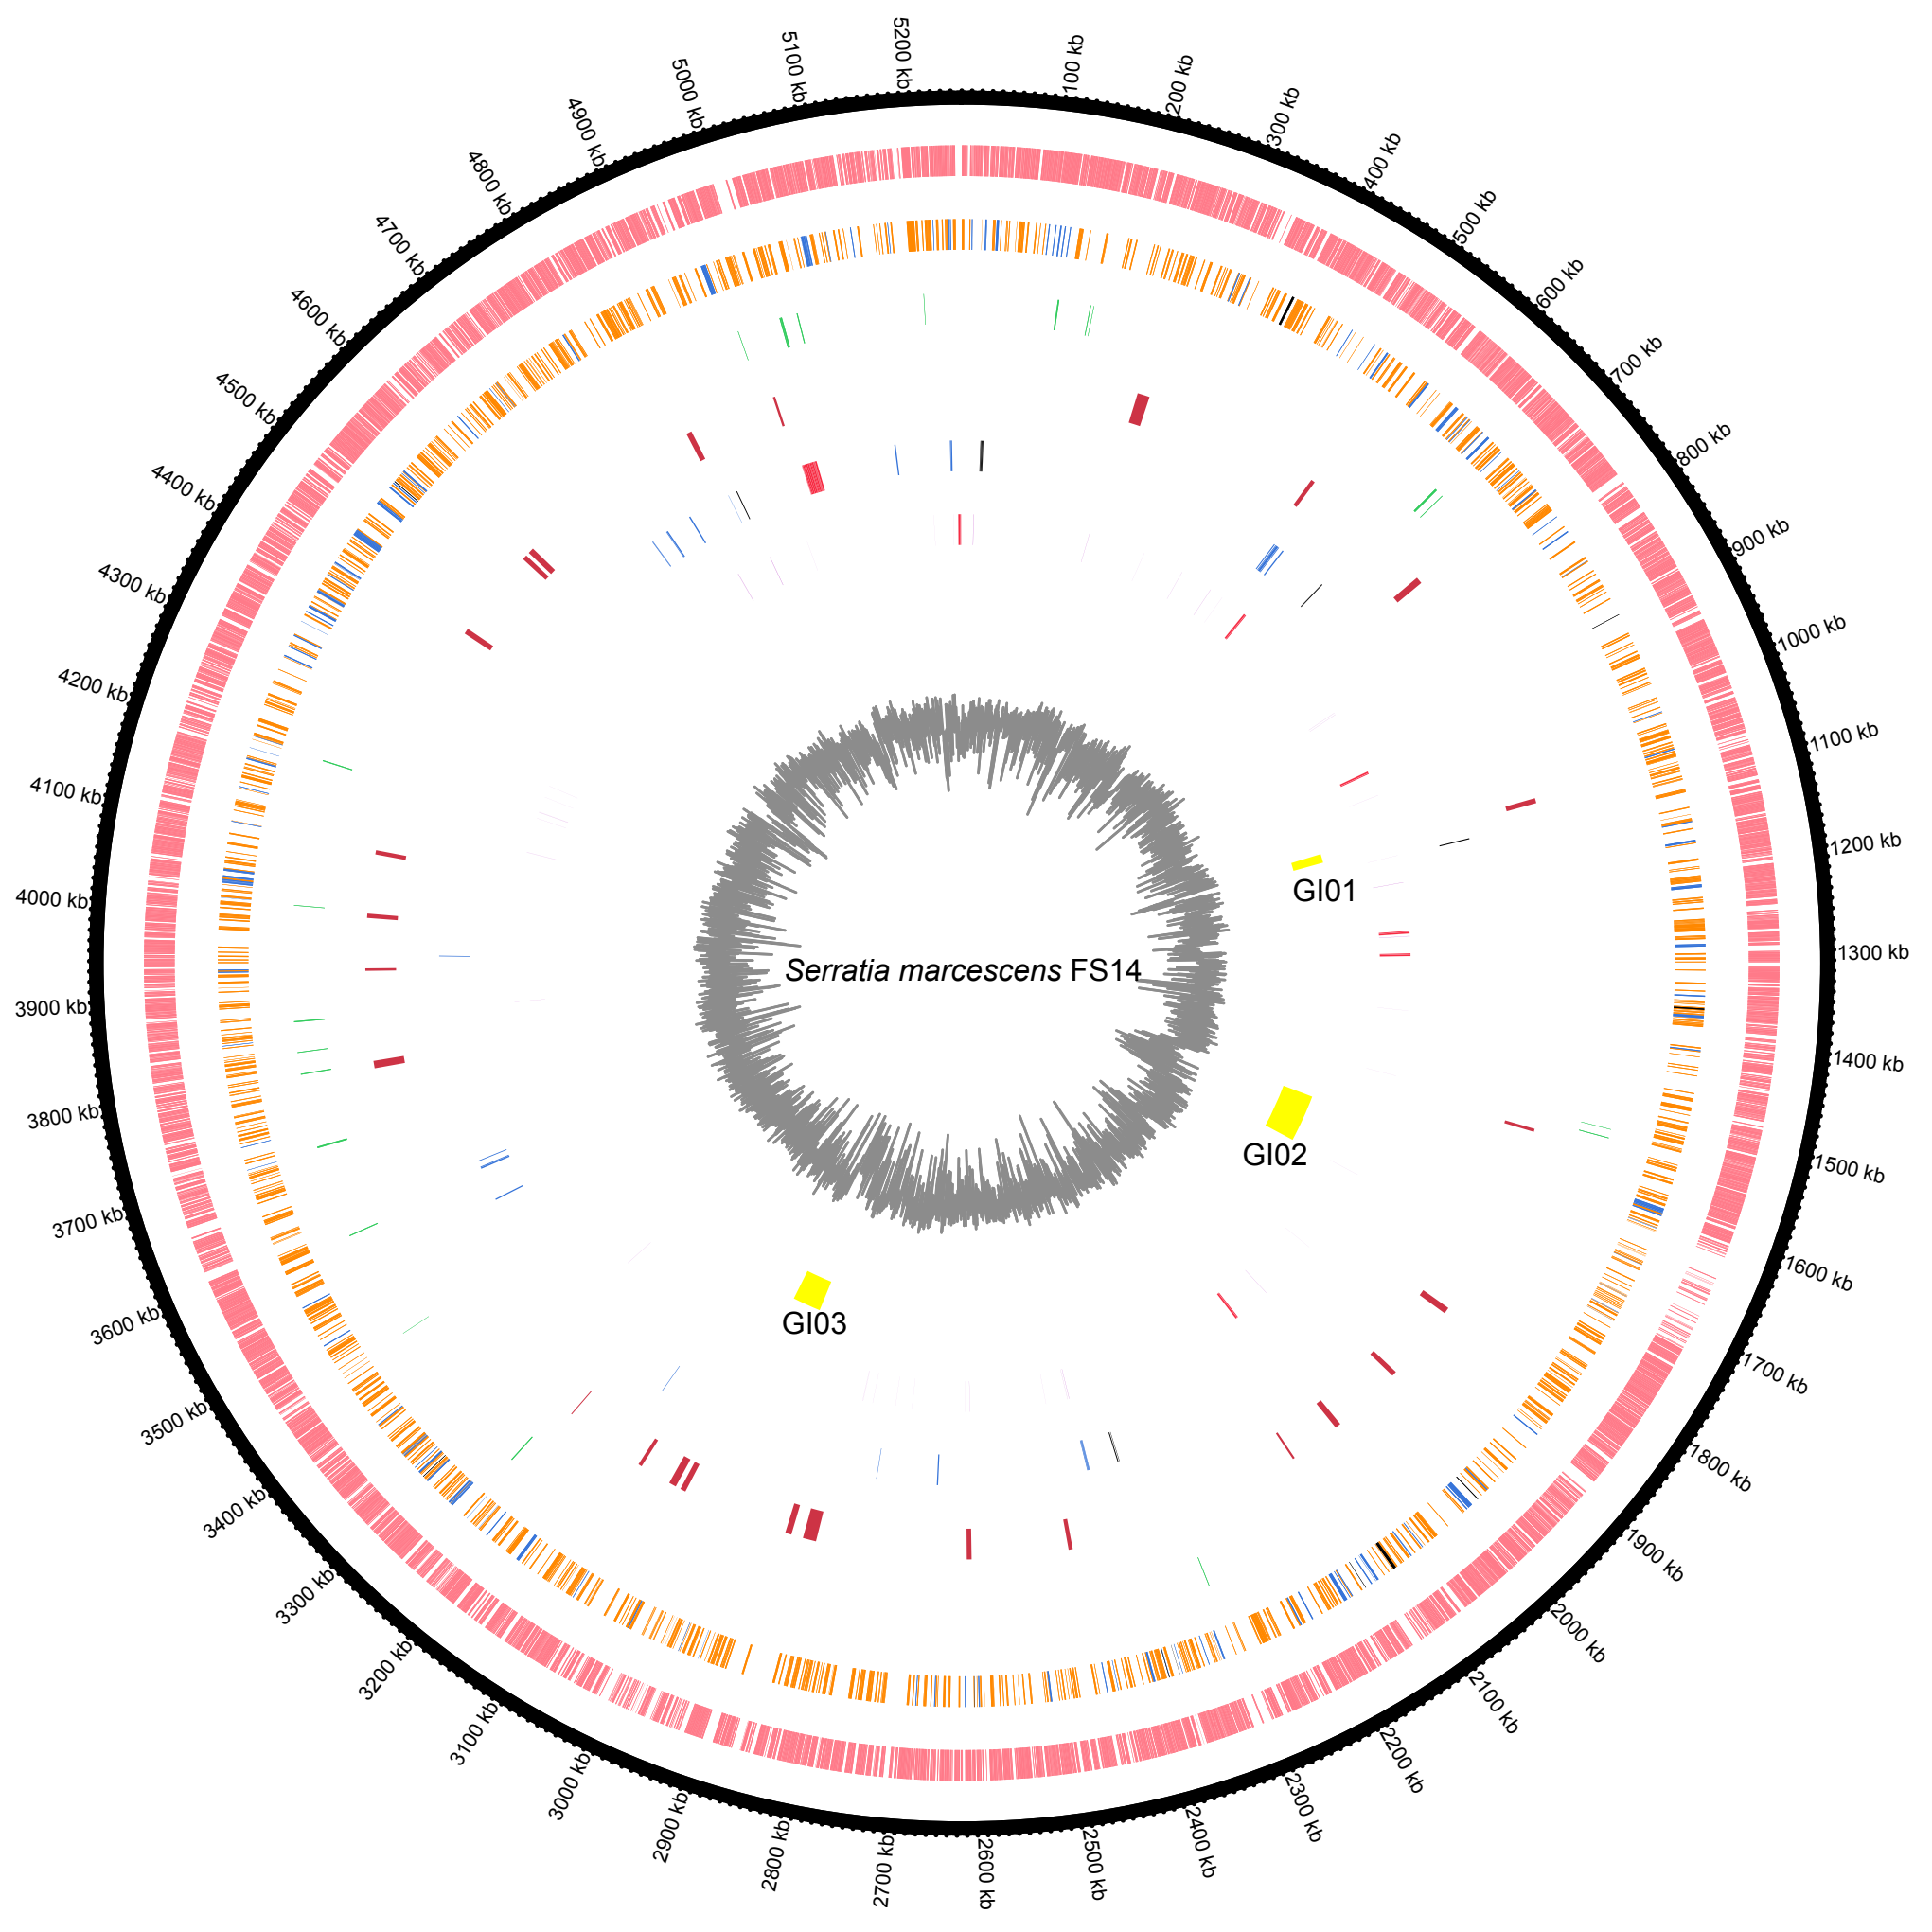

Supplement: pone.0123061.s001.pdf [file pone.0123061.s001.pdf]
